# Supplementary material
Source: PubMed Central journal article supplement (PMC6234016)
Supplement: NIHMS973365-supplement-1.pdf [file NIHMS973365-supplement-1.pdf]

## Supplement Figure 1

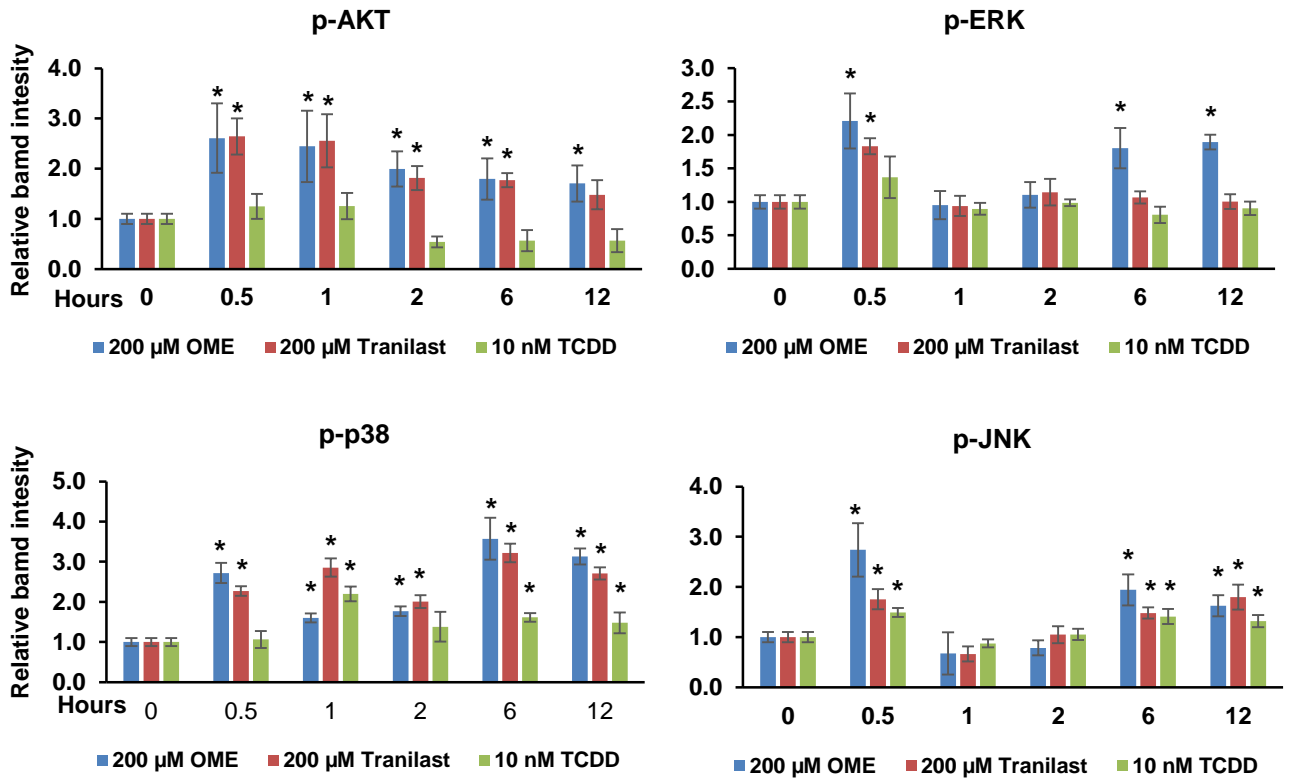

**Supplemental Figure 1.** Band intensities for Figures 1A-1C. The band intensities (normalized to GAPDH) for p-Akt, p-Erk, p-p38 and p-JNK at various time points after treatment were determined by densitometry and presented as means  $\pm$  SE for 3 replicated determinations. Significant ( $p < 0.05$ ) induction is indicated (\*).
