# Supplementary material
Source: PubMed Central journal article supplement (PMC6234016)
Supplement: NIHMS973365-supplement-2.pdf [file NIHMS973365-supplement-2.pdf]

## Supplement Figure 2

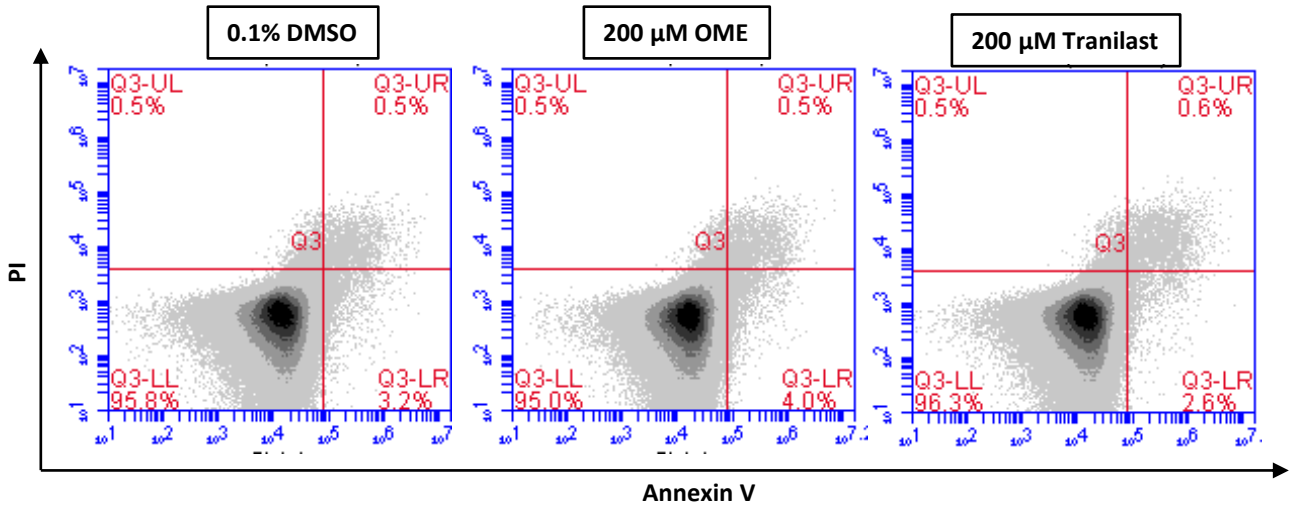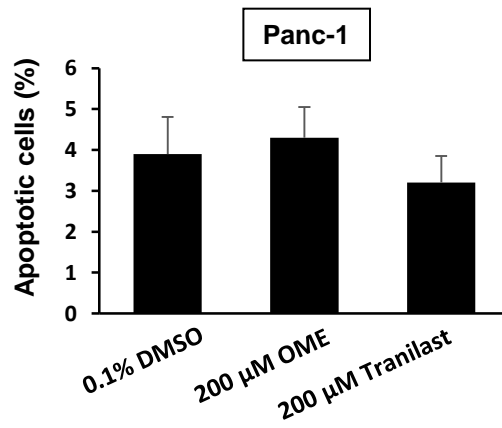

**Supplemental Figure 2.** Induction of Annexin V staining. Panc1 cells were treated with DMSO, 200  $\mu$ M omeprazole (OME), or 200  $\mu$ M tranilast for 24 hr. Annexin V staining was determined as outlined in the Materials and Methods. Results are means  $\pm$  SE for 3 replicate determinations.
