# Supplementary material
Source: PubMed Central journal article supplement (PMC6234016)
Supplement: NIHMS973365-supplement-4.pdf [file NIHMS973365-supplement-4.pdf]

**Supplemental Table 1.** The sequences of the primers used for real-time PCR.

| Gene   |           | Primer                                 |
|--------|-----------|----------------------------------------|
| CYP1A1 | sense     | 5'- GAC CAC AAC CAC CAA GAA C-3'       |
|        | antisense | 5'- AGC GAA GAA TAG GGA TGA AG-3'      |
| CYP1B1 | sense     | 5'- TAT CAC TGA CAT CTT CGG CG-3'      |
|        | antisense | 5'- ACC TGA TCC AAT TCT GCC TG-3'      |
| ACSL4  | sense     | 5'- ACG CGG TTC CTT TTT GC-3'          |
|        | antisense | 5'- CAC GAA TAT CTT CTG TGA TTT CAA-3' |
| ALCAM  | sense     | 5'- CTT CTG CCT CTT GAT CTC CG-3'      |
|        | antisense | 5'- AGG TAC GTC AAG TCG GCA AG-3'      |
| STMN3  | sense     | 5'- ACT TGC GCC TCT CCA GC-3'          |
|        | antisense | 5'- CAC CGA CAG CTC CTT CAT CT-3'      |
| FHL2   | sense     | 5'- GGT GTG CTT TGA GAC CCT GT-3'      |
|        | antisense | 5'- GTG CCG GTC CTT GTA AGA CA-3'      |
| NRP2   | sense     | 5'- AAA TCG AGA AGC ACG ACT GC-3'      |
|        | antisense | 5'- CGA TGT TCC CAC AGT GTT TG-3'      |
| ZYX    | sense     | 5'- GAG TGC AGG AGA AGC AGC AC-3'      |
|        | antisense | 5'- CCA CCT CCT TCA GAG TCA GG-3'      |
| TBP    | sense     | 5'-GAT CAG AAC AAC AGC CTG CC-3'       |
|        | antisense | 5'-TTC TGA ATA GGC TGT GGG GT-3'.      |
